# Supplementary material
Source: PubMed Central journal article supplement (PMC2519389)
Supplement: supp_190_16_5729__1.pdf [file supp_190_16_5729__1.pdf]

## Supplemental material

**Why does pfam04002 correspond only to the C-terminus of RadC?** Whereas RadC is a ~220-residue widespread bacterial protein (COG2003), the conserved domain called pfam04002 corresponds solely to the C-terminal moiety of the protein. This is due to the fact that the limits of *Escherichia coli radC* were originally defined through complementation of the *radC102* mutation. A *radC102* complementing region was localized on a 1.2-kb BglII/BglII DNA fragment which was sequenced (7). The sequenced complementing fragment contained a potential translation start codon (ATG) followed by an open reading frame of 297 base pairs corresponding to a predicted polypeptide of Mr 11,500. The two protein entries (ACCESSIONs CAA44967 and CAA44966) in the database defined on this basis represent truncated versions (99 residue long) of the full-size RadC protein (222 residues) of *E. coli* K12 (ACCESSION NP\_418095).

**There is a need to redefine the limits of pfam04002.** Since it has been unambiguously demonstrated by Lombardo and Rosenberg (9) that the *radC102* mutation is in fact an allele of *recG*, it would be appropriate to simply remove ACCESSIONs CAA44967 and CAA44966 from the database.

The limits of pfam04002, now DUF2466, should also be redefined so as to match the full-size RadC protein of *E. coli* because this protein aligns throughout its entire length with the orthologous protein of *Streptococcus pneumoniae* and its many bacterial orthologues (data not shown).

**Analysis of the fate of transforming DNA.** 2 ml *S. pneumoniae* cultures ( $10^8$  cfu/ml) were pre-incubated at 37°C for 2 min and competence was induced with synthetic CSP1 (8) (100 ng/ml) for 15 min at 37°C. Competent cells were then incubated for 3 min at 30°C with 9 µl of a 7771-bp *S. pneumoniae* fragment uniformly labeled with  $^{32}\text{P}$  (500 ng;  $1.56 \times 10^6$  cpm). This fragment was generated by PCR-amplification in the presence of [ $\alpha^{32}\text{P}$ ]-dATP, using as template R800 chromosomal DNA and the BM37–AM15 primer pair (Table S1) as previously described (3) but with the Phusion polymerase (Ozyme). Uptake was terminated with DNase I (50 µg/ml; 100 Kunitz Units/ml) and incubation was continued for 1 min. To cool-down the culture, 8 ml of cold CAT medium were then added before centrifugation for 10 min at 10,000 g to harvest cells. The pellet was resuspended in 200 µl SEDS and cells were lysed as described (3). Two phenol extractions followed by ethanol precipitation were used to recover total DNA which was resuspended in 50 µl Tris buffer (10 mM, pH 8.5).

DNA was submitted to overnight electrophoresis (30-35 V/cm) on 30-cm-long 1% agarose gel in Tris-acetate/EDTA buffer. Gels were dried for 2 h at 53°C before exposure to a phosphorimager screen (Fuji Photo Film). Electrophoregrams were analyzed using the MultiGauge software (Fujifilm).

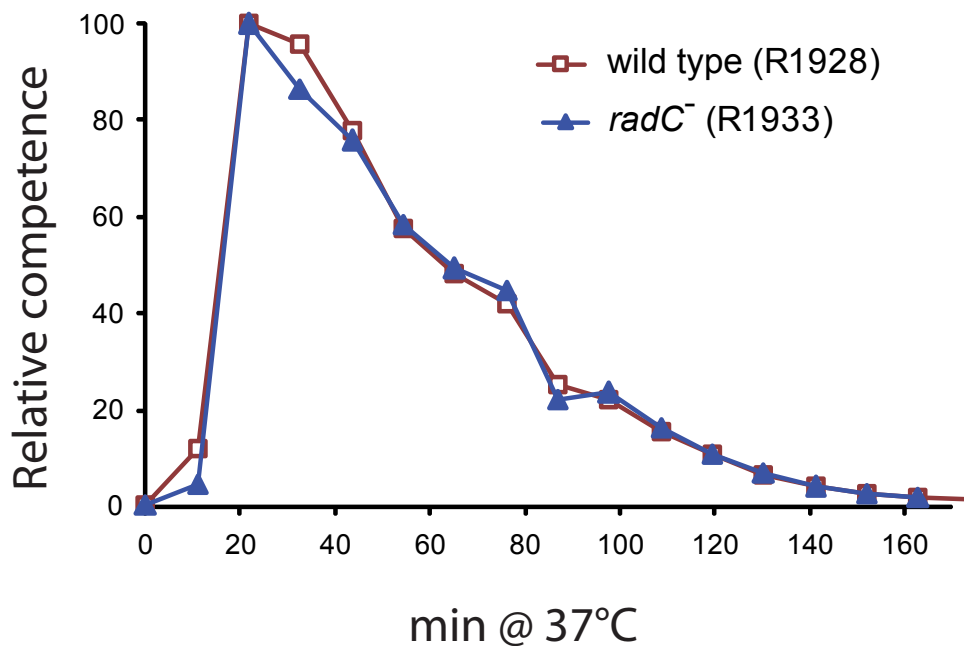

**FIG. S1. Kinetics of competence induction and decay in wildtype and *radC* mutant cells.**

The possible effect of *radC* inactivation on the kinetics of competence induction and decay was assessed by comparing expression of a competence-induced gene, *ssbB*, in wildtype and *radC* mutant cells. Expression of *ssbB* was monitored using a transcriptional fusion with the *Photinus pyralis luc* gene encoding firefly luciferase, the activity of which can be measured directly in living *S. pneumoniae* cells as previously described (Prudhomme and Claverys, 2007). Cultures grown in C+Y medium (initial pH 7.0) to OD<sub>492</sub>=0.12 were centrifuged, resuspended in 1/10<sup>th</sup> initial volume, and kept frozen (-80°C). To monitor the response to CSP, cells were thawed, diluted 10-fold in C+Y (pH 7.9), and 280 µl were deposited in a 96-well plate. 20 µl of luciferin (2.7 mg/ml) and 0.3 µl CSP (100 µg/ml) were added. Luminescence, which reflects luciferase activity and reports on competence, and OD<sub>492</sub> were measured during incubation at 37°C. Maximum luminescence (expressed in relative luminescence units, RLU/OD) was 2567 and 2855 RLU/OD, respectively for strains R1928 (wild type) and R1933 (*radC* mutant).

For both strains, *ssbB* expression reached its highest point ~20 min after CSP addition. Competence decay appeared very similar in both wildtype and *radC* mutant cells as judged from the decrease in *ssbB* expression.

These data suggest that RadC plays no role in the response to CSP and in the decay of CSP-induced competence.

**FIG. S2. Spontaneous competence induction in wildtype and *radC* mutant cultures.**

It is well known that spontaneous competence induction is strongly dependent on the initial pH of the culture medium. For instance, initial pH values between 6.8 and 8.0 affected the timing of the occurrence and the level of competence (5). Therefore, to assess the possible effect of *radC* inactivation on the kinetics of spontaneous competence induction, we compared competence induction under a wide range of initial pH values.

Competence was monitored using the *ssbB::luc* transcriptional fusion (see legend to Fig. S1). Luciferase activity (symbols and solid lines) and OD<sub>492</sub> (dotted lines) were measured in cultures of strain R1848 (wild type; dark blue diamonds) and strain R1932 (*radC* mutant; pink squares) grown at 37°C. For each strain, two parallel cultures were inoculated (1/100<sup>th</sup> dilution) in C+Y medium at different initial pH (as indicated) from precultures grown in acidic C+Y medium to OD<sub>492</sub>=0.4. Standard deviation between culture pairs is indicated by error bars.

No significant difference is observed between the two strains suggesting that RadC plays no role in the control of spontaneous competence development in *S. pneumoniae*.

Initial pH

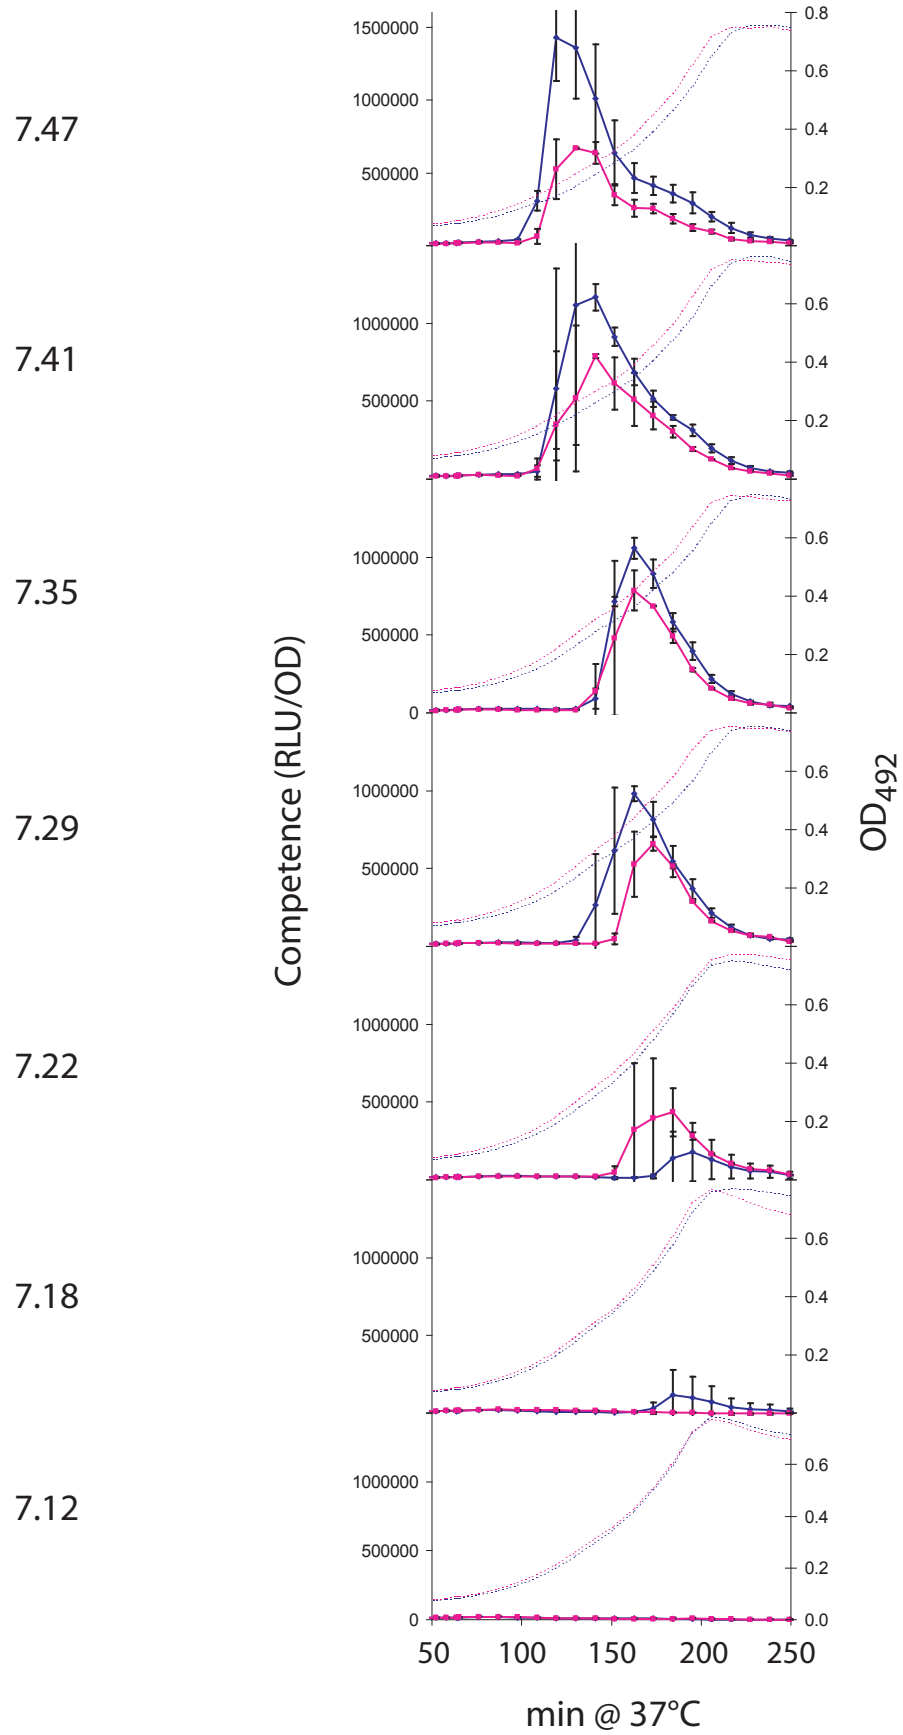

Fig. S2. Attaiech *et al.*

**Table S1.** Strains, plasmids, and primers used in this study

| Strains                                | Genotype/description                                                                                                                                                                                                                                                              | Source/reference |
|----------------------------------------|-----------------------------------------------------------------------------------------------------------------------------------------------------------------------------------------------------------------------------------------------------------------------------------|------------------|
| <b><i>Streptococcus pneumoniae</i></b> |                                                                                                                                                                                                                                                                                   |                  |
| R304                                   | R800 derivative, <i>nov1</i> , <i>rif23</i> , <i>str41</i> ; Nov <sup>R</sup> , Rif <sup>R</sup> , Sm <sup>R</sup>                                                                                                                                                                | (11)             |
| R800                                   | R6 derivative                                                                                                                                                                                                                                                                     | (10)             |
| R990                                   | R800 but <i>rpsL1</i> ; <i>cbpD::kan-rpsL<sup>+</sup></i> ; Sm <sup>S</sup> , Kan <sup>R</sup>                                                                                                                                                                                    | (15)             |
| R1409                                  | R800 but <i>comA::kan<sup>42A</sup></i> (12)*, <i>ssbB::pR424 (luc)</i> , <i>ssbB<sup>+</sup></i> , <i>recA::ermAM</i> ; Cm <sup>R</sup> , Ery <sup>R</sup> , Kan <sup>R</sup>                                                                                                    | This study       |
| R1501                                  | R800 but $\Delta comC$                                                                                                                                                                                                                                                            | (6)              |
| R1502                                  | R1501 but <i>ssbB::pR424 (luc)</i> , <i>ssbB<sup>+</sup></i> ; Cm <sup>R</sup>                                                                                                                                                                                                    | (6)              |
| R1750                                  | R800 but <i>comA::kan<sup>C</sup></i> (2), <i>ssbB::pR424 (luc)</i> , <i>ssbB<sup>+</sup></i> , <i>hexA<math>\Delta</math>3::ermAM</i> , <i>comEC<sup>H562A</sup></i> , <i>dprA::spc<sup>21C</sup></i> ; Cm <sup>R</sup> , Ery <sup>R</sup> , Kan <sup>R</sup> , Spc <sup>R</sup> | This study       |
| R1848                                  | R800 but <i>ssbB::pR424 (luc)</i> , <i>ssbB<sup>+</sup></i> , <i>hexA<math>\Delta</math>3::ermAM</i> , <i>comEC<sup>H562A</sup></i> ; Cm <sup>R</sup> , Ery <sup>R</sup>                                                                                                          | This study       |
| R1928                                  | R1502 but <i>hexA<math>\Delta</math>3::ermAM</i> , <i>comEC<sup>H562A</sup></i> ; Ery <sup>R</sup> , Cm <sup>R</sup>                                                                                                                                                              | This study       |
| R1932                                  | R1848 but <i>radC::spc<sup>4C</sup></i> ; Ery <sup>R</sup> , Cm <sup>R</sup> , Spc <sup>R</sup>                                                                                                                                                                                   | This study       |
| R1933                                  | R1928 but <i>radC::spc<sup>4C</sup></i> ; Ery <sup>R</sup> , Cm <sup>R</sup> , Spc <sup>R</sup>                                                                                                                                                                                   | This study       |
| R1939                                  | R1750 but <i>radC::spc<sup>4C</sup></i> ; Ery <sup>R</sup> , Cm <sup>R</sup> , Spc <sup>R</sup> , Kan <sup>R</sup>                                                                                                                                                                | This study       |
| R1966                                  | R1501 but <i>radC::spc<sup>4C</sup></i> ; Spc <sup>R</sup>                                                                                                                                                                                                                        | This study       |
| R1969                                  | R1502 but <i>radC::spc<sup>4C</sup></i> ; Cm <sup>R</sup> , Spc <sup>R</sup>                                                                                                                                                                                                      | This study       |
| R2327                                  | R990 but <i>radC::spc<sup>4C</sup></i> ; Sm <sup>S</sup> , Kan <sup>R</sup> , Spc <sup>R</sup>                                                                                                                                                                                    | This study       |
| <b>Plasmids</b>                        |                                                                                                                                                                                                                                                                                   |                  |
| pR290                                  | pR201 (1) derivative carrying a 1596 bp <i>BglIII-HindIII</i> genomic fragment (position 1104584-1106179; R6 genome accession number AE007317); Amp <sup>R</sup> , Ery <sup>R</sup>                                                                                               | This study       |
| pR412                                  | pEMcat derivative carrying a Spc <sup>R</sup> ( <i>aad9</i> gene) <i>mariner</i> minitransposon; Amp <sup>R</sup> , Spc <sup>R</sup>                                                                                                                                              | (13)             |
| pR424                                  | COLE1 derivative carrying an <i>S. pneumoniae</i> 5'- <i>ssbB</i> targeting fragment adjacent to <i>luc</i> ; Amp <sup>R</sup> , Cm <sup>R</sup>                                                                                                                                  | (4)              |
| pLS1                                   | pMV158 derivative, replicative plasmid (rolling-circle type); Tet <sup>R</sup>                                                                                                                                                                                                    | (14)             |
| pLS70                                  | pLS1 derivative carrying a 3486 bp <i>PstI</i> genomic fragment (position 1897751-1901236, R6 genome accession number AE007317); Tet <sup>R</sup>                                                                                                                                 | (14)             |
| <b>Primers</b>                         |                                                                                                                                                                                                                                                                                   |                  |
|                                        | <b>Sequence; gene; position<sup>§</sup></b>                                                                                                                                                                                                                                       |                  |
| AM15                                   | TCGTATCATCAACCAAAGATTGCT; downstream from the <i>ami</i> operon (AE005672)                                                                                                                                                                                                        | This study       |

|       |                                                                                             |            |
|-------|---------------------------------------------------------------------------------------------|------------|
| BM37  | GGAATTCGGATCCTAAACTCCAAAGTTTCTGCGTC ; (3)<br>upstream from the <i>ami</i> operon (AE005672) |            |
| MP127 | CCGGGGACTTATCAGCCAACC; mariner transposon                                                   | (13)       |
| MP128 | TACTAGCGACGCCATCTATGTG; mariner transposon                                                  | (13)       |
| radC1 | TCGTACCAATTATAACCGTCCGA; <i>radC</i> ; -464                                                 | This study |
| radC2 | CGATTGGTGATCAAGAAATGGCC; <i>radC</i> ; +1237                                                | This study |

<sup>§</sup>Position is given with respect to the ATG of the corresponding gene; - and + indicate upstream and downstream, respectively

<sup>C</sup> and <sup>A</sup> indicate respectively the co-transcribed and the reverse orientation of an inserted mini-transposon antibiotic resistance gene with respect to the targeted gene

\*minitransposon inserted at position 94 with respect to the ATG of *comA*

## Supplemental references

1. **Alloing, G., M. C. Trombe, and J. P. Claverys.** 1990. The *ami* locus of the Gram-positive bacterium *Streptococcus pneumoniae* is similar to binding protein-dependent transport operons of Gram-negative bacteria. *Mol. Microbiol.* **4**:633-644.
2. **Bergé, M., I. Mortier-Barrière, B. Martin, and J. P. Claverys.** 2003. Transformation of *Streptococcus pneumoniae* relies on DprA- and RecA-dependent protection of incoming single strands. *Mol. Microbiol.* **50**:527-536.
3. **Bergé, M., M. Moscoso, M. Prudhomme, B. Martin, and J. P. Claverys.** 2002. Uptake of transforming DNA in Gram-positive bacteria: a view from *Streptococcus pneumoniae*. *Mol. Microbiol.* **45**:411-421.
4. **Chastanet, A., M. Prudhomme, J. P. Claverys, and T. Msadek.** 2001. Regulation of *Streptococcus pneumoniae clp* genes and their role in competence development and stress survival. *J. Bacteriol.* **183**:7295-7307.
5. **Chen, J. D. and D. A. Morrison.** 1987. Modulation of competence for genetic transformation in *Streptococcus pneumoniae*. *J. Gen. Microbiol.* **133**:1959-1967.
6. **Dagkessamanskaia, A., M. Moscoso, V. Hénard, S. Guiral, K. Overweg, M. Reuter, B. Martin, J. Wells, and J. P. Claverys.** 2004. Interconnection of competence, stress and CiaR regulons in *Streptococcus pneumoniae*: competence triggers stationary phase autolysis of *ciaR* mutant cells. *Mol. Microbiol.* **51**:1071-1086.
7. **Felzenszwalb, I., S. Boiteux, and J. Laval.** 1992. Molecular cloning and DNA sequencing of the *radC* gene of *Escherichia coli* K-12. *Mutat. Res.* **273**:263-269.
8. **Håvarstein, L. S., G. Coomaraswamy, and D. A. Morrison.** 1995. An unmodified heptadecapeptide pheromone induces competence for genetic transformation in *Streptococcus pneumoniae*. *Proc. Natl. Acad. Sci. USA* **92**:11140-11144.

9. **Lombardo, M. J. and S. M. Rosenberg.** 2000. *radC102* of *Escherichia coli* is an allele of *recG*. *J. Bacteriol.* **182**:6287-6291.
10. **Martin, B., H. Prats, and J. P. Claverys.** 1985. Cloning of the *hexA* mismatch repair of *Streptococcus pneumoniae* and identification of the product. *Gene* **34**:293-303.
11. **Mortier-Barrière, I., A. de Saizieu, J. P. Claverys, and B. Martin.** 1998. Competence-specific induction of *recA* is required for full recombination proficiency during transformation in *Streptococcus pneumoniae*. *Mol. Microbiol.* **27**:159-170.
12. **Prudhomme, M., L. Attaiech, G. Sanchez, B. Martin, and J. P. Claverys.** 2006. Antibiotic stress induces genetic transformability in the human pathogen *Streptococcus pneumoniae*. *Science* **313**:89-92.
13. **Prudhomme, M., A. Camilli, and J. P. Claverys.** 2007. *In vitro* mariner mutagenesis of *Streptococcus pneumoniae*: tools and traps, p. 511-518. In R. Hakenbeck and G. S. Chhatwal (ed.), *The Molecular Biology of Streptococci*. Horizon Scientific Press.
14. **Stassi, D., P. López, M. Espinosa, and S. A. Lacks.** 1981. Cloning of chromosomal genes in *Streptococcus pneumoniae*. *Proc. Natl. Acad. Sci. USA* **78**:7028-7032.
15. **Sung, C. K., H. Li, J. P. Claverys, and D. A. Morrison.** 2001. An *rpsL* Cassette, Janus, for Gene Replacement through Negative Selection in *Streptococcus pneumoniae*. *Appl. Environ. Microbiol.* **67**:5190-5196.
